# Supplementary material
Source: PubMed Central journal article supplement (PMC4268439)
Supplement: NIHMS549383-supplement-1.pdf [file NIHMS549383-supplement-1.pdf]

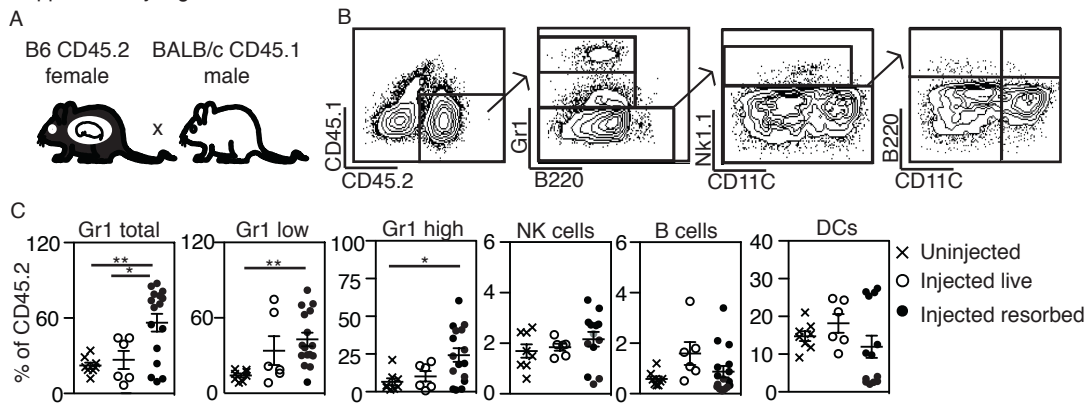

Supplementary Figure 1: (A) Experimental design, (B) gating strategy and representative flow cytometry plots, and (C) percentages of various leukocyte populations in uterine segments surrounding uninjected, injected live and injected resorbed fetuses after fetal PBS injection. Monocytes: Gr1low gate, neutrophils Gr1high gate; NK cells: NK1.1+ gate; B cells: B220+ gate, DCs: CD11c+ gate.  $N \geq 6$  uterine segments in  $n \geq 2$  independent experiments. Each data point represents a uterine segment surrounding one fetus. \* $P < 0.05$ , \*\* $P \leq 0.01$  by ANOVA with Tukey's multiple comparison test.

Supplementary Figure 2

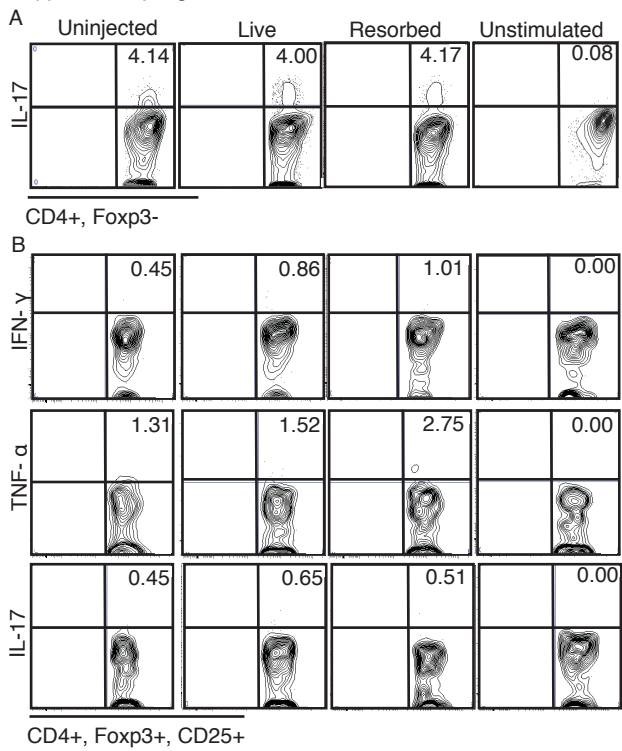

Supplementary Figure 2: (A) Representative flow cytometry plots of IL-17 production by uterine CD4 Tconv cells (CD4+Foxp3-) harvested from pregnant dams 5 days after fetal PBS injection, after stimulation with PMA and ionomycin. Percentages obtained in one representative experiment from 4 independent experiments shown. (B) Minimal production of IFN- $\gamma$ , TNF- $\alpha$ , and IL-17 by CD4+Foxp3+CD25+ Tregs in the uterus. Percentages obtained in one representative experiment from 4 independent experiments shown.

Supplementary Figure 3

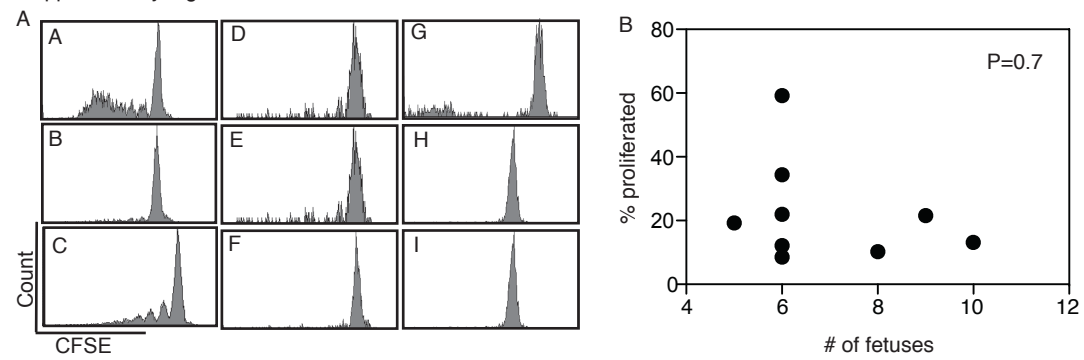

Supplementary Figure 3: (A) Variability in the proliferation of adoptively transferred fetal antigen-specific TCR75 cells in normal allogeneic pregnancies (B6 female mated to BALB/c male) without fetal intervention. Experimental design and gating strategy are as outlined for Figure 4. CFSE profiles of TCR75 cells recovered from uterine draining lymph nodes of 9 separate dams in 6 separate experiments are shown. (B) A nonparametric correlation test (Spearman) was used to compare the percentage of proliferated TCR75 cells and the number of fetuses in each pregnant dam.

Supplementary Figure 4

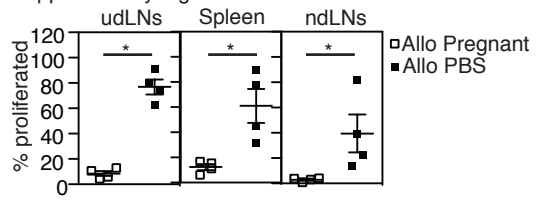

Supplementary Figure 4: The percentage of proliferated TCR75 cells among total TCR75 cells after PBS injection in the uterine draining lymph node (udLNs), spleens, and non-draining lymph nodes (ndLNs).  $N \geq 4$  dams in each group in  $\geq 3$  separate experiments. \* $P < 0.05$  by Mann-Whitney test.
